# Supplementary material
Source: publisher figshare collection journal article supplement (https://acs.figshare.com/ndownloader/files/4262251)
Supplement: Supplementary file 1 [file 4262251]

# **Fluorinating Hexagonal Boron Nitride into Diamond-like Nanofilms with Tunable Band Gap and Ferromagnetism**

Zhuhua Zhang, Xiao Cheng Zeng and Wanlin Guo

## **Outline:**

- 1) Energetics comparison,**
- 2) Molecular dynamics simulation.**
- 3) Band structures of HF-BN nanofilms.**

## 1) Energetics comparison

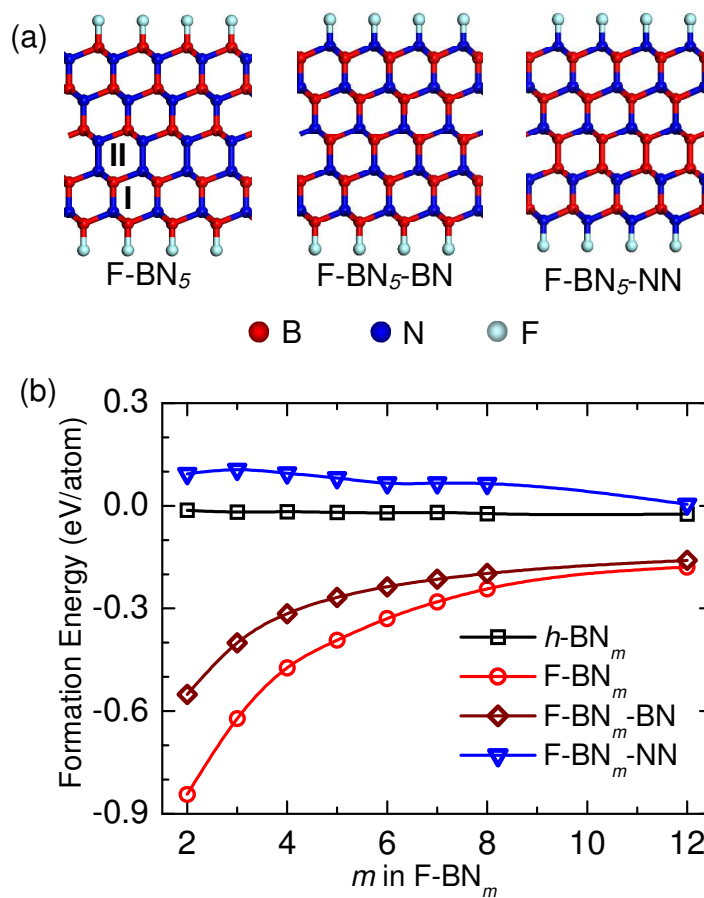

**Figure S1.** (a) Front views of atomic structures for the  $sp^3$  bonded F-BN<sub>m</sub> nanofilms with different termination atoms. (b) Formation energies of  $h$ -BN<sub>m</sub>, F-BN<sub>m</sub>, F-BN<sub>m</sub>-BN and F-BN<sub>m</sub>-BB nanofilms as a function of  $m$ . In the formed nanofilm, the N-N bond length is 1.48 Å in average, shorter than 1.59 Å of other B-N bonds.

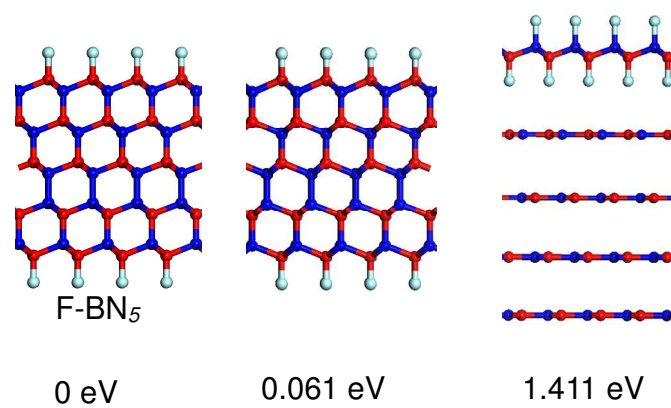

**Figure S2.** Front views of atomic structures for two possible polymorphs of the F-BN<sub>5</sub> nanofilms and their relative energies per unit cell with respect to the F-BN<sub>5</sub> nanofilms.

## 2) Molecular dynamics simulation

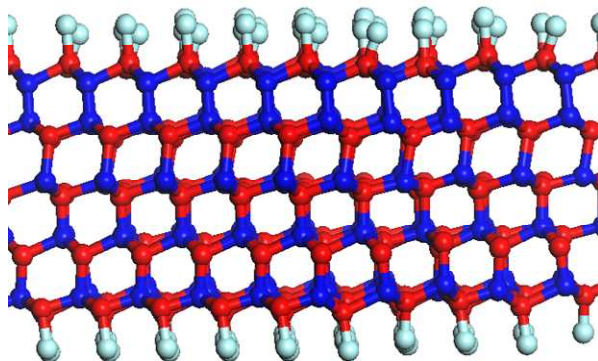

**Figure S3.** Snapshots of the F-BN<sub>5</sub> nanofilm at the end of 5ps quantum molecular dynamics simulations.

### 3) Band structures of HF-BN nanofilms.

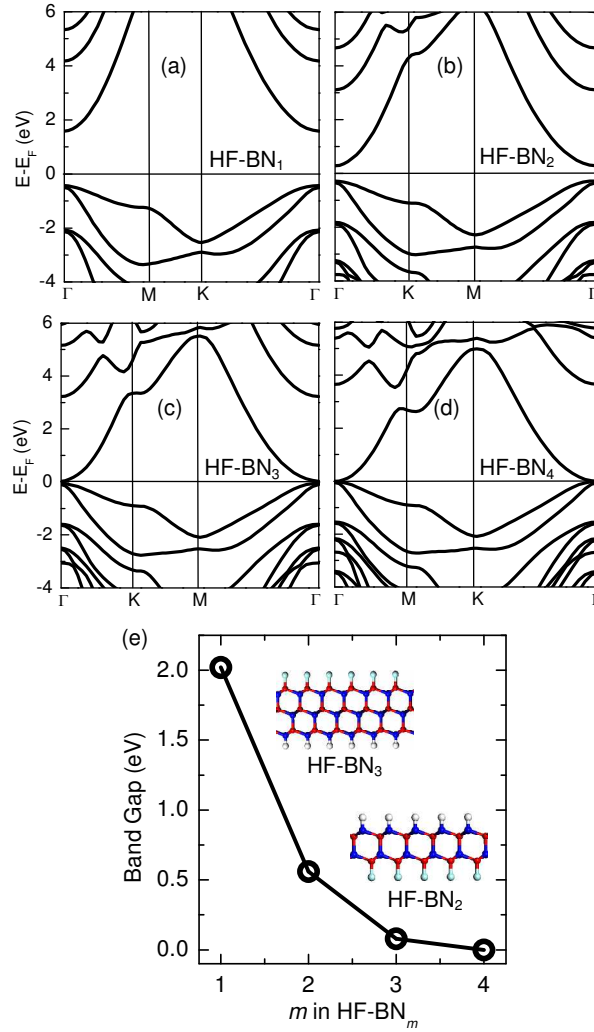

**Figure S4.** (a-d) Band structures of the HF-BN<sub>m</sub> nanofilms. (e) Band gap as a function of  $m$  in the HF-BN<sub>m</sub> nanofilm. Insets show the atomic structures of the HF-BN<sub>3</sub> and HF-BN<sub>2</sub> nanofilms.

A merit of these single-crystalline HF-BN nanofilms is their desirable electronic properties. For example, the HF-BN<sub>3</sub> nanofilm possesses a direct LDA gap of 0.08 eV and an effective electron mass of  $0.95 m_0$  ( $m_0$  is the mass of free electron), close to that of silicon. Moreover, the LDA gap of the HF-BN nanofilms is reduced quickly with increasing film thickness and their structures are robust to carrier doping.
